# Supplementary material
Source: publisher figshare collection journal article supplement (https://frontiersin.figshare.com/ndownloader/files/11821115)
Supplement: Supplementary file 1 [file 11821115]

## *Supplementary Material*

### **Seasonal variation in transport of zooplankton into the Arctic Basin through the Atlantic gateway, Fram Strait**

Sünnje L. Basedow<sup>\*1</sup>, Arild Sundfjord<sup>2</sup>, Wilken-Jon von Appen<sup>3</sup>, Elisabeth Halvorsen<sup>1</sup>, Slawomir Kwasniewski<sup>4</sup>, Marit Reigstad<sup>1</sup>

**\* Correspondence:** Corresponding Author: [sunnje.basedow@uit.no](mailto:sunnje.basedow@uit.no)

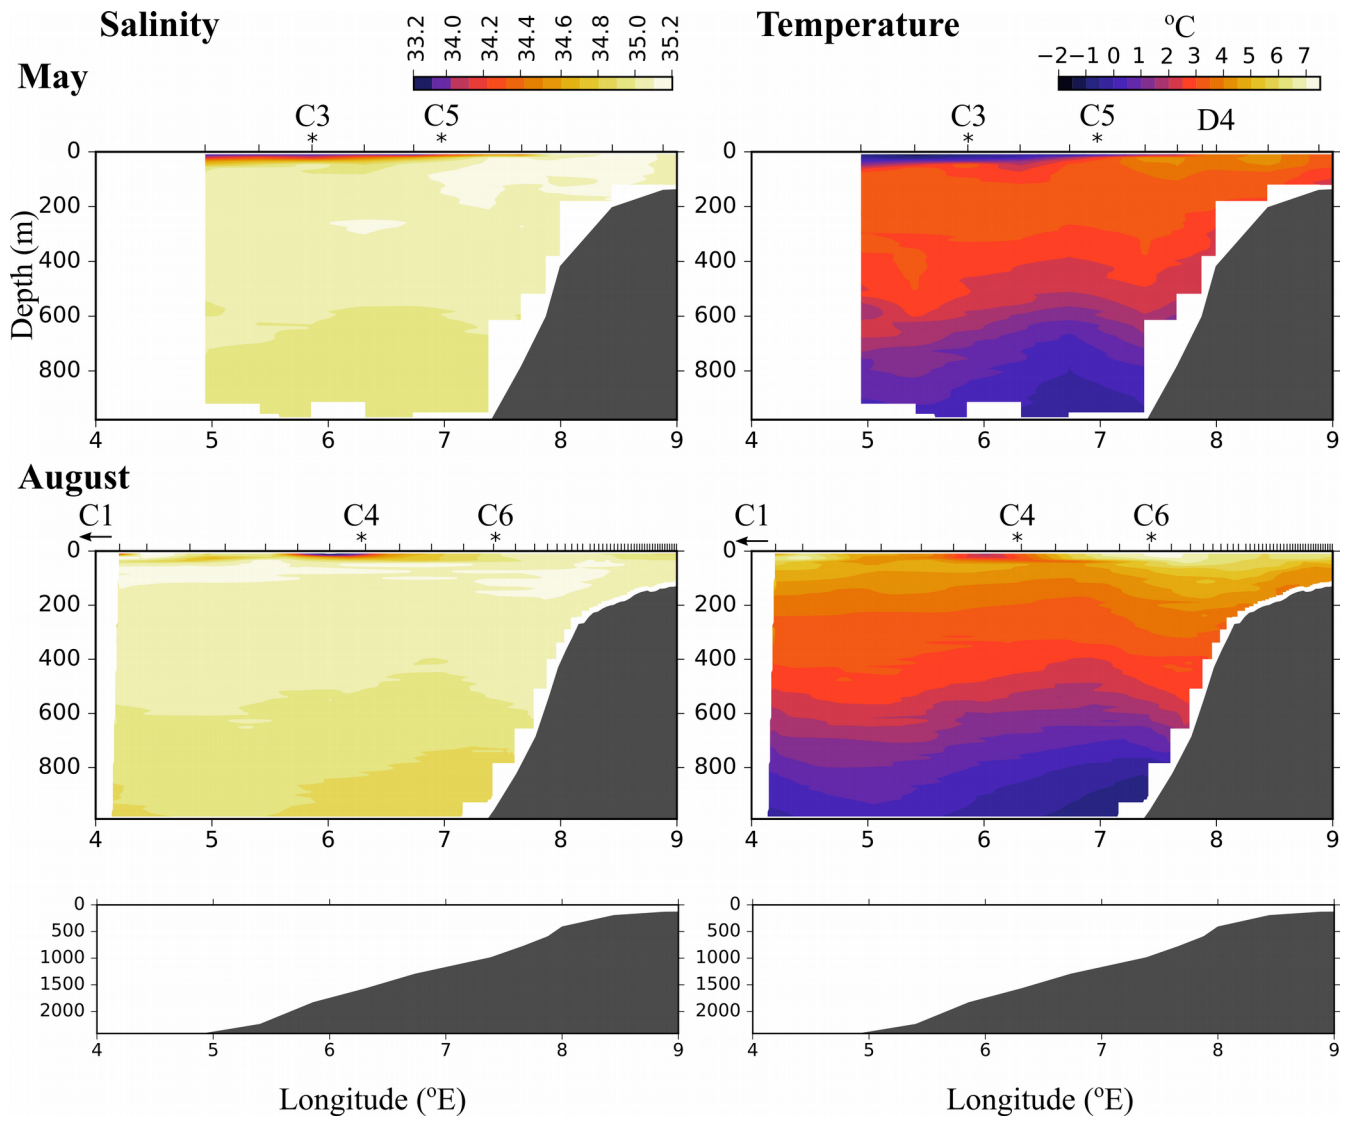

Fig. A1. Salinity (left) and temperature (right) along transect C in May (top panels) and August (bottom panels). Ticks on the top axis indicate the start position of profiles, stars mark the approximate position of stations that were sampled after completion of the transects. An arrow indicates that stations lay outside of the sampled transect.
